# Supplementary material
Source: Springer Nature journal article supplement (https://www.springermedizin.de/resource/supplementary/12950_2009_140_MOESM2_ESM.pdf/9558062)

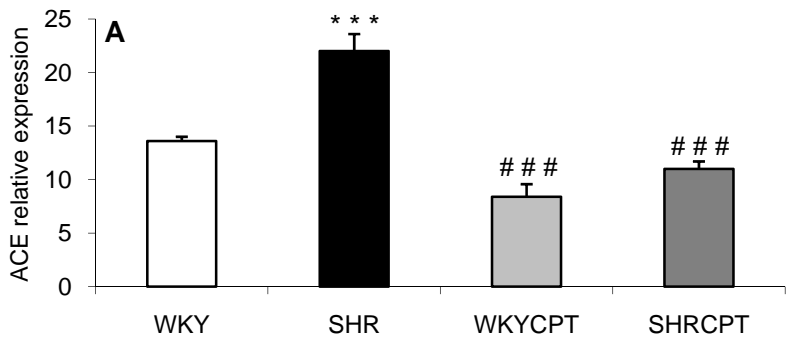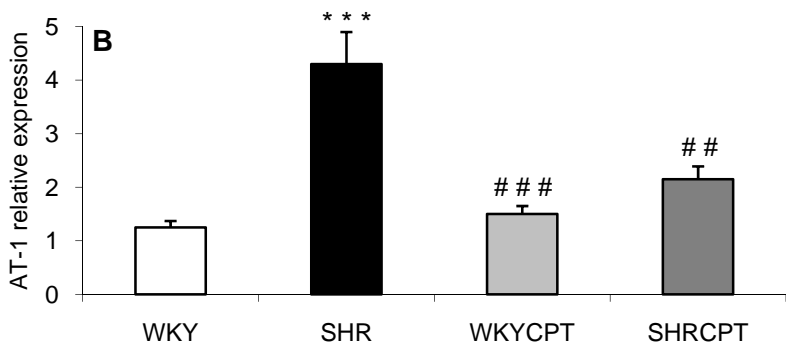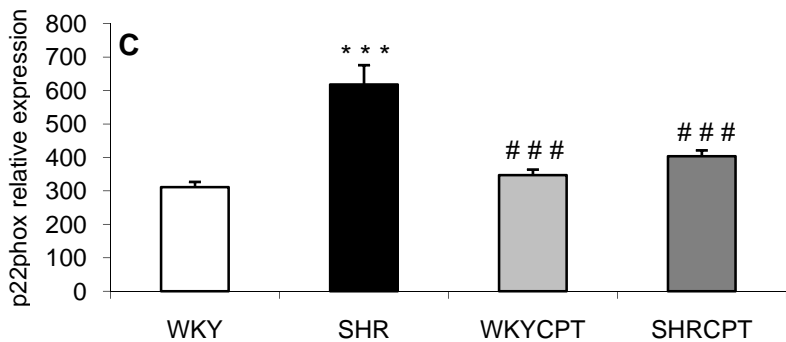

Supplement: MOESM2 [file 9558062]
